# Supplementary material for: Accurate loop calling for 3D genomic data with cLoops
Source: Oxford University Press journal article supplement (doi:10.1093/bioinformatics/btz651), 2019-08-20
Supplement: bioinformatics_36_3_666_s5.docx [file bioinformatics_36_3_666_s5.docx]

Supplemental Information of

**Accurate loops calling for 3D genome data with cLoops**

Yaqiang Cao 1,†, Zhaoxiong Chen 1,2,†, Xingwei Chen 1,†, Daosheng Ai 1,†, Guoyu Chen 1,2, Joseph McDermott 1,2, Yi Huang 1, Xiaoxiao Guo 2 and Jing-Dong J. Han 1,2,*

1 CAS Key Laboratory of Computational Biology, CAS-MPG Partner Institute for Computational Biology, Shanghai Institute of Nutrition and Health, Chinese Academy of Sciences Center for Excellence in Molecular Cell Science, Collaborative Innovation Center for Genetics and Developmental Biology, Shanghai Institutes for Biological Sciences, Chinese Academy of Sciences, 320 Yue Yang Road, Shanghai, 200031, China. 2 Peking-Tsinghua Center for Life Sciences, Academy for Advanced Interdisciplinary Studies, Center for Quantitative Biology (CQB), Peking University, Beijing 100871, China.

* To whom correspondence should be addressed.

†The authors wish it to be known that, in their opinion, the first four authors should be regarded as Joint First Authors.

**Corresponding Author:**  Dr. Jing-Dong J. Han, CAS-MPG Partner Institute for Computational Biology, Shanghai, 200031, China, (Phone): +86-21-54920458, (Fax): +86-21-54920451, E-mail: [jdhan@picb.ac.cn](mailto:jdhan@picb.ac.cn).

**Supplemental Methods**

**kDBSCAN and the simulation data for performance comparison with cDBSCAN**

kDBSCAN is implemented in DBSCAN with KD-tree for neighbor search. We used scipy.spatial.cKDTree for the KD-tree, which was coded in C. Specifically, the points in the 2D spaces were first built as a KD-tree, when querying for neighbors in expand cluster functions, the kdtree.query_ball_point was called. The code of cDBSCAN and kDBSCAN have been deposited to GitHub and are available at: <https://github.com/YaqiangCao/cLoops_supplementaryData/tree/master/SupplementaryData/benchmarking/1.simulatedData> , with file names of cDBSCAN.py and kDBSCAN.py.

100 clusters were generated randomly with centers for i from 1 to 100, where and are random integers uniformly selected from (-5000, 5000). And the signal points were generated by sklearn.datasets.samples_generator.make_blobs around the centers with samples set to 10,000 and std to 0.2. The noise points were generated randomly in the space as floats. For the comparison, parameters and were used. The code for benchmarking is available at: <https://github.com/YaqiangCao/cLoops_supplementaryData/tree/master/SupplementaryData/benchmarking>

**Mathematical model for loop significance determination**

Using the permuted local background (PLB), an enrichment score is calculated as:

E 1

where is the number of PETs linking the anchors , is the number of permutated regions, is the number of PETs linking the permuted regions.

FDR is defined as the ratio of permuted local regions that have more PETs than the candidate loop.

E 2

The hypergeometric test is carried out as,

E 3

Where is the total PET number in the chromosome for the region , are the total PETs in the region j (one anchor).

Using the PLB, the Poisson test can be carried out (as all numbers are integers) as,

E 4

and the binomial test as,

E 5

Where is the possibility of observing 1 PETs link of the two regions normalized by the depth of the interacting regions, estimated as:

E 6

The final p-values for the hypergeometric test, Poisson test and binomial test are reported before and after correcting for multiple hypothesis testing using the Bonferroni method, multiplying the numbers of tests in that chromosome.

**Summary of loop-calling tools comparison methods**

Software version, references, key parameters, and input of loop calling tools for ChIA-PET, Hi-C and HiChIP to compare with cLoops are summarized in **Supplemental Table 2**. The Trac-looping-methods called loops for resting CD4+ (GSE87254_DHS1K_rest_3PETs_fdr.txt.gz) were obtained from GEO.

To run HiCCUPS, HIC files were generated by Juicer with input converted from HiC-Pro’s output file with suffix of allValidPairs. When running HiCCUPS for the K562 Hi-C data, there was an error of jcuda.CudaException halt the result, so we separated K562 Hi-C data by chromosomes and run HiCCUPS for every chromosomes then combined all the result. To run HOMER, HiC-Pro’s output file with suffix of allValidPairs was converted to the required HiCSummary format. There was no specific setting or errors when analyzing Hi-C and HiChIP data by HOMER. To run Fit-Hi-C, Hi-C and HiChIP data were separated by chromosome. The output from HiC-Pro was converted to Fit-Hi-C input by HiC-Pro’s script named hicpro2fithic.py. Even for the 10kb resolution contact matrix fed to Fit-Hi-C, chr1 needs more than 75G RAM and chr2 needs about 80G. To run GOTHiC, PETs BAM file output by HiC-Pro was separated by chromosome and then feed to GOTHiC. To run diffHic, PETs BAM file output by HiC-Pro was used as input. If a specific resolution of contact matrix was needed by a tool, it was set to 10kb.

For all data tested, cLoops needs no more than 30G RAM when using one CPU. Loops called by cLoops and the commands to run cLoops are available at:

<https://github.com/YaqiangCao/cLoops_supplementaryData/tree/master/SupplementaryData/loops/ChIA-PET>

<https://github.com/YaqiangCao/cLoops_supplementaryData/tree/master/SupplementaryData/loops/Hi-C>

<https://github.com/YaqiangCao/cLoops_supplementaryData/tree/master/SupplementaryData/loops/HiChIP>

<https://github.com/YaqiangCao/cLoops_supplementaryData/tree/master/SupplementaryData/loops/Trac-looping>

**Supplemental Information**

**Personal computer configuration**

| System | Ubuntu 14.04 |
| --- | --- |
| CPU | Intel i706900k/3.2G/20M/FCLGA14A/Box, 16GPUs |
| RAM | 94G |
| GPU | NVIDIA TITAN Xp, 4GPUs |
| Swap | 95G |
| GPU Memory | 48G |

**Supplemental Tables**

**Supplemental Table 1. Public Datasets**

| Accession | Data Type | Cell Type | Factor | Reference |
| --- | --- | --- | --- | --- |
| GSM1551619 | Hi-C | K562 | None | (Rao et al. 2014) |
| GSM1436264 | ChIA-PET | K562 | RAD21 | (Heidari et al. 2014) |
| GSM1436260 | ChIA-PET | K562 | POL2RA | (Heidari et al. 2014) |
| [GSM1436263](https://www.ncbi.nlm.nih.gov/geo/query/acc.cgi?acc=GSM1436263) | ChIA-PET | K562 | H3K4me1 | (Heidari et al. 2014) |
| [GSM1436261](https://www.ncbi.nlm.nih.gov/geo/query/acc.cgi?acc=GSM1436263) | ChIA-PET | K562 | H3K4me3 | (Heidari et al. 2014) |
| [GSM1436262](https://www.ncbi.nlm.nih.gov/geo/query/acc.cgi?acc=GSM1436263) | ChIA-PET | K562 | H3K27ac | (Heidari et al. 2014) |
| ENCODE | ChIP-seq | K562 | H3K4me1 | (Boyle et al. 2014) |
| ENCODE | ChIP-seq | K562 | H3K4me3 | (Boyle et al. 2014) |
| ENCODE | ChIP-seq | K562 | H3K27ac | (Boyle et al. 2014) |
| GSM1872888 | ChIA-PET | Hela | CTCF | (Tang et al. 2015) |
| ENCODE | ChIP-seq | Hela | CTCF | (Boyle et al. 2014) |
| GSM1551552 | Hi-C | GM12878 | None | (Rao et al. 2014) |
| GSM1872886 | ChIA-PET | GM12878 | CTCF | (Tang et al. 2015) |
| GSM1436265 | ChIA-PET | GM12878 | RAD21 | (Boyle et al. 2014) |
| GSM2138324,GSM2138325,GSM2138326,GSM2138327 | HiChIP | GM12878 | cohesin | (Mumbach et al. 2016) |
| ENCODE | ChIP-seq | GM12878 | CTCF | (Boyle et al. 2014) |
| ENCODE | ChIP-seq | GM12878 | SMC3 | (Boyle et al. 2014) |
| ENCODE | ChIP-seq | GM12878 | RAD21 | (Boyle et al. 2014) |
| GSE87254 | Trac-looping | Resting CD4+ | None | (Lai et al. 2018) |
| GSM2627271,  GSM2627272 | Hi-C | Resting CD4+ | None | (Lai et al. 2018) |

**Supplemental Table 2. Summary of state-of-art loop calling tools for comparison**

| Software and Reference | Target Data Type | Programming  Language | Input | Key Parameters | Significant Loops Requirements |
| --- | --- | --- | --- | --- | --- |
| Mango (v1.2.0) (Phanstiel et al. 2015) | ChIA-PET | C++ & R | Raw data in FASTQ format | default | PETs >= 5 and FDR<0.01 |
| ChiaSig (v093) (Paulsen et al. 2014) | ChIA-PET | C++ | All potential interactions, output of Mango .all.Mango file | -M 1000000 -m 8000 -C 5 -c 5 | PETs >= 5 and FDR<=0.01 |
| ChIA-PET2 (v0.9.2) (Li et al. 2017) | ChIA-PET | C++ & R | Raw data in FASTQ format | default | PETs >= 5 and FDR<=0.01 |
| HiCCUPS (v1.7.5_linux_x64_jcuda)  (Durand et al. 2016) | Hi-C | JAVA (GPU Needed) | HIC file from Juicer | --ignore_sparsity | default |
| HOMER (v4.9.1)  (Heinz et al. 2010) | Hi-C | C++ & Perl | Mapped PETs in HiCSummary format | res 2000  superRes 10000 | FDR<0.05 |
| Fit-Hi-C (v1.0.3)  (Ay et al. 2014) | Hi-C | Python | fragments, interactions and biases by ICE, from hicprotofithic in HiC-Pro | 10000 resolution from HiC-Pro,-L 20000 | FDR<0.05 |
| GOTHiC (v1.14.0)  (Mifsud et al. 2017) | Hi-C | R | Mapped PETs in BAM format | res 10000 | FDR<0.001  PETs>=30 for Hi-C, PET>=10 for HiChIP |
| diffHiC (v1.10.0)  (Lun and Smyth 2015) | Hi-C | C++ & R | Mapped PETs in BAM format | res 10000  min.enrich=0.5, min.count=10,  min.diag=2L | Default |
| hichipper (v0.7.0) (Lareau and Aryee 2018) | HiChIP | C++, Python & R | HiC-Pro Output | Default, | PETs>=2, FDR<=0.01 |

**Supplemental Table 3. Run time of ChIA-PET tools**

Used time is formatted as hour::mint:second.

| ChIA-PET Data | cLoops (using only one CPU) | Mango (only loop calling step, stage 4:5) | ChiaSig (only loop calling step) | ChIA-PET2 (only loop calling step, the MICC step) |
| --- | --- | --- | --- | --- |
| GM12878 CTCF | 0:33:15 | 0:9:39 | 1:16:57 | 2:42:54 |
| GM12878 RAD21 | 0:21:01 | 0:7:39 | 1:29:52 | 5:23:41 |
| HeLa CTCF | 0:08:03 | 0:3:52 | 0:55:19 | 2:17:21 |
| K562 H3K27ac | 0:40:39 | 0:7:54 | 0:17:26 | Can’t find loops |
| K562 H3K4me1 | 1:10:12 | 0:13:13 | 1:52:28 | Can’t find loops |
| K562 H3K4me3 | 0:20:56 | 0:8:58 | 0:07:17 | 1:05:22 |
| K562 POL2RA | 3:45:05 | 1:39:26 | 0:39:53 | 0:19:16 |
| K562 RAD21 | 0:45:03 | 0:7:39 | 1:31:49 | 0:07:20 |

**Supplemental Table 4. Run time of Hi-C tools**

| Tool (requirement) | GM12878 Hi-C (hour:mint:second) | K562 Hi-C (hour:mint:second) |
| --- | --- | --- |
| cLoops (only using one CPU) | 52:20:28 | 67:58:47 |
| HiCCUPS | 1:31:45 | 1:17:3 |
| HOMER (only using one CPU) | 11:20:34 | 12:43:36 |
| diffHic | 3:24:06 | 5:57:12 |
| Fit-Hi-C | 23:10:48 | 21:42:22 |
| GOTHiC | 14:47:44 | 33:59:21 |

**Supplemental Table 5. Run time of tools on unsaturated sequenced cohesin HiChIP data**

| Tool (requirement) | Bio1_Rep1 (hour:mint: second) | Bio1_Rep2 (hour:mint:second) |
| --- | --- | --- |
| cLoops (only using one CPU) | 2:05:04 | 1:33:39 |
| HiCCUPS | 1:26:20 | 1:24:56 |
| HOMER (only using one CPU) | 10:27:57 | 10:37:04 |
| hichipper | 2:35:55 | 1:46:39 |
| diffHic | 00:40:17 | 00:29:39 |
| Fit-Hi-C | 17:54:37 | 17:49:32 |
| GOTHiC | 3:14:49 | 5:04:36 |

**Supplemental Table 6. Common usage case run time of cLoops on all dataset with 5 CPU**

| Sample | Data type | Parameter | Time | Max RAM per subprocess | cis PETs number |
| --- | --- | --- | --- | --- | --- |
| GM12878_CTCF | ChIA-PET | -p 5 -m 1 | 0:09:31 | 0.960 GB | 11945791 |
| GM12878_RAD21 | ChIA-PET | -p 5 -m 1 | 0:06:17 | 0.957 GB | 9951912 |
| HeLa_CTCF | ChIA-PET | -p 5 -m 1 | 0:02:30 | 0.525 GB | 4738395 |
| K562_H3K27ac | ChIA-PET | -p 5 -m 2 | 0:12:12 | 0.987 GB | 8998153 |
| K562_H3K4me1 | ChIA-PET | -p 5 -m 2 | 0:19:49 | 1.565 GB | 15034538 |
| K562_H3K4me3 | ChIA-PET | -p 5 -m 1 | 0:06:27 | 0.627 GB | 6039893 |
| K562_POL2RA | ChIA-PET | -p 5 -m 1 | 1:23:39 | 1.574 GB | 17208252 |
| K562_RAD21 | ChIA-PET | -p 5 -m 1 | 0:15:01 | 0.699 GB | 6708766 |
| GM12878 | HiC | -p 5 -m 3 | 19:27:38 | 14.279 GB | 248875756 |
| K562 | HiC | -p 5 -m 3 | 20:20:24 | 18.561 GB | 286291107 |
| chesin_bio1_tech1 | HiChIP | -p 5 -m 0 -minPts 15,20 -eps 5000,7500,10000 | 0:35:12 | 2.379 GB | 37945699 |
| chesin_bio1_tech2 | HiChIP | -p 5 -m 0 -minPts 10,15 -eps 5000,7500,10000 | 0:24:20 | 1.711 GB | 24317312 |
| Trac-Looping | Trac-Looping | -p 5 -m 0 -eps 500,1000,2000,5000 -minPts 5 -cut 2000 -max_cut | 1:06:26 | 2.188 GB | 26993868 |

**Supplemental Table 7. Manually marked GM12878 HiC chr21 loops**

| chr | start | end | chr | start | end |
| --- | --- | --- | --- | --- | --- |
| chr21 | 10630000 | 10650000 | chr21 | 10565000 | 10585000 |
| chr21 | 14530000 | 14545000 | chr21 | 14615000 | 14630000 |
| chr21 | 14575000 | 14590000 | chr21 | 14475000 | 14490000 |
| chr21 | 14675000 | 14700000 | chr21 | 14520000 | 14545000 |
| chr21 | 15410000 | 15520000 | chr21 | 14835000 | 14915000 |
| chr21 | 15445000 | 15515000 | chr21 | 14375000 | 14425000 |
| chr21 | 15460000 | 15510000 | chr21 | 15125000 | 15185000 |
| chr21 | 15780000 | 15795000 | chr21 | 15730000 | 15745000 |
| chr21 | 16315000 | 16355000 | chr21 | 16065000 | 16100000 |
| chr21 | 16630000 | 16645000 | chr21 | 16485000 | 16495000 |
| chr21 | 17820000 | 17825000 | chr21 | 17845000 | 17850000 |
| chr21 | 17895000 | 17910000 | chr21 | 17775000 | 17800000 |
| chr21 | 20400000 | 20430000 | chr21 | 20225000 | 20255000 |
| chr21 | 25020000 | 25045000 | chr21 | 24885000 | 24905000 |
| chr21 | 25165000 | 25190000 | chr21 | 24890000 | 24905000 |
| chr21 | 25290000 | 25315000 | chr21 | 24885000 | 24910000 |
| chr21 | 25295000 | 25315000 | chr21 | 25385000 | 25405000 |
| chr21 | 25375000 | 25405000 | chr21 | 24885000 | 24910000 |
| chr21 | 25380000 | 25405000 | chr21 | 25175000 | 25200000 |
| chr21 | 25390000 | 25395000 | chr21 | 25560000 | 25565000 |
| chr21 | 25395000 | 25400000 | chr21 | 25460000 | 25465000 |
| chr21 | 25500000 | 25505000 | chr21 | 25460000 | 25465000 |
| chr21 | 25700000 | 25735000 | chr21 | 25600000 | 25615000 |
| chr21 | 25705000 | 25740000 | chr21 | 25390000 | 25410000 |
| chr21 | 25705000 | 25750000 | chr21 | 25165000 | 25210000 |
| chr21 | 25780000 | 25815000 | chr21 | 25600000 | 25635000 |
| chr21 | 25860000 | 25875000 | chr21 | 25600000 | 25620000 |
| chr21 | 26150000 | 26185000 | chr21 | 25880000 | 25900000 |
| chr21 | 26710000 | 26725000 | chr21 | 25880000 | 25895000 |
| chr21 | 27690000 | 27725000 | chr21 | 26835000 | 26870000 |
| chr21 | 28730000 | 28765000 | chr21 | 26820000 | 26865000 |
| chr21 | 29070000 | 29085000 | chr21 | 29225000 | 29240000 |
| chr21 | 29345000 | 29380000 | chr21 | 29075000 | 29115000 |
| chr21 | 29810000 | 29875000 | chr21 | 29075000 | 29130000 |
| chr21 | 29835000 | 29860000 | chr21 | 29460000 | 29485000 |
| chr21 | 31050000 | 31105000 | chr21 | 30325000 | 30360000 |
| chr21 | 31175000 | 31190000 | chr21 | 31130000 | 31140000 |
| chr21 | 31505000 | 31510000 | chr21 | 31470000 | 31475000 |
| chr21 | 31570000 | 31600000 | chr21 | 31190000 | 31205000 |
| chr21 | 31575000 | 31610000 | chr21 | 31090000 | 31110000 |
| chr21 | 31725000 | 31730000 | chr21 | 31660000 | 31665000 |
| chr21 | 32235000 | 32280000 | chr21 | 31855000 | 31880000 |
| chr21 | 32250000 | 32290000 | chr21 | 31765000 | 31800000 |
| chr21 | 32585000 | 32620000 | chr21 | 32375000 | 32410000 |
| chr21 | 32705000 | 32740000 | chr21 | 32375000 | 32415000 |
| chr21 | 33150000 | 33210000 | chr21 | 32640000 | 32690000 |
| chr21 | 33180000 | 33210000 | chr21 | 32915000 | 32950000 |
| chr21 | 33300000 | 33315000 | chr21 | 33195000 | 33225000 |
| chr21 | 33370000 | 33390000 | chr21 | 33195000 | 33220000 |
| chr21 | 34340000 | 34370000 | chr21 | 33905000 | 33950000 |
| chr21 | 34590000 | 34660000 | chr21 | 33905000 | 33950000 |
| chr21 | 34605000 | 34640000 | chr21 | 34360000 | 34375000 |
| chr21 | 36020000 | 36035000 | chr21 | 35830000 | 35845000 |
| chr21 | 36310000 | 36350000 | chr21 | 36130000 | 36170000 |
| chr21 | 36910000 | 36950000 | chr21 | 36615000 | 36645000 |
| chr21 | 36915000 | 36950000 | chr21 | 36415000 | 36440000 |
| chr21 | 38120000 | 38170000 | chr21 | 37695000 | 37735000 |
| chr21 | 38315000 | 38375000 | chr21 | 37680000 | 37730000 |
| chr21 | 38335000 | 38370000 | chr21 | 38150000 | 38175000 |
| chr21 | 39110000 | 39150000 | chr21 | 38710000 | 38760000 |
| chr21 | 39700000 | 39735000 | chr21 | 39510000 | 39535000 |
| chr21 | 42055000 | 42065000 | chr21 | 41860000 | 41870000 |
| chr21 | 42220000 | 42255000 | chr21 | 41990000 | 42020000 |
| chr21 | 42250000 | 42270000 | chr21 | 42140000 | 42160000 |
| chr21 | 42425000 | 42455000 | chr21 | 42305000 | 42335000 |
| chr21 | 42425000 | 42460000 | chr21 | 42135000 | 42175000 |
| chr21 | 42510000 | 42555000 | chr21 | 41850000 | 41880000 |
| chr21 | 42525000 | 42550000 | chr21 | 42140000 | 42160000 |
| chr21 | 42715000 | 42730000 | chr21 | 42630000 | 42650000 |
| chr21 | 42985000 | 43035000 | chr21 | 6425000 | 6440000 |
| chr21 | 43260000 | 43270000 | chr21 | 43200000 | 43210000 |
| chr21 | 43625000 | 43670000 | chr21 | 42895000 | 42935000 |
| chr21 | 43630000 | 43665000 | chr21 | 43185000 | 43215000 |
| chr21 | 43960000 | 43975000 | chr21 | 43805000 | 43820000 |
| chr21 | 44060000 | 44080000 | chr21 | 43985000 | 44005000 |
| chr21 | 44190000 | 44360000 | chr21 | 5030000 | 5165000 |
| chr21 | 44670000 | 44695000 | chr21 | 44480000 | 44505000 |
| chr21 | 44770000 | 44805000 | chr21 | 44485000 | 44530000 |
| chr21 | 44780000 | 44810000 | chr21 | 44335000 | 44375000 |
| chr21 | 44930000 | 44945000 | chr21 | 44790000 | 44805000 |
| chr21 | 45090000 | 45155000 | chr21 | 44775000 | 44815000 |
| chr21 | 45120000 | 45140000 | chr21 | 44940000 | 44960000 |
| chr21 | 45420000 | 45470000 | chr21 | 45120000 | 45160000 |
| chr21 | 45440000 | 45480000 | chr21 | 44920000 | 44970000 |
| chr21 | 45810000 | 45830000 | chr21 | 45550000 | 45570000 |
| chr21 | 45810000 | 45845000 | chr21 | 45445000 | 45475000 |
| chr21 | 45810000 | 45860000 | chr21 | 45125000 | 45165000 |
| chr21 | 46005000 | 46020000 | chr21 | 45950000 | 45965000 |
| chr21 | 46330000 | 46345000 | chr21 | 46230000 | 46245000 |
| chr21 | 46445000 | 46460000 | chr21 | 46330000 | 46345000 |

**Supplemental Table 8. Manually marked K562 HiC chr21 loops**

| chr | start | end | chr | start | end |
| --- | --- | --- | --- | --- | --- |
| chr21 | 5025000 | 5160000 | chr21 | 44250000 | 44320000 |
| chr21 | 5205000 | 5260000 | chr21 | 7225000 | 7325000 |
| chr21 | 5215000 | 5255000 | chr21 | 9820000 | 9855000 |
| chr21 | 5215000 | 5255000 | chr21 | 10570000 | 10655000 |
| chr21 | 6430000 | 6500000 | chr21 | 42910000 | 43050000 |
| chr21 | 9940000 | 9960000 | chr21 | 9875000 | 9895000 |
| chr21 | 10325000 | 10345000 | chr21 | 10265000 | 10275000 |
| chr21 | 10570000 | 10580000 | chr21 | 10325000 | 10335000 |
| chr21 | 14110000 | 14130000 | chr21 | 13800000 | 13830000 |
| chr21 | 14725000 | 14765000 | chr21 | 14505000 | 14545000 |
| chr21 | 15430000 | 15510000 | chr21 | 14850000 | 14900000 |
| chr21 | 15460000 | 15495000 | chr21 | 15225000 | 15260000 |
| chr21 | 15460000 | 15520000 | chr21 | 14245000 | 14320000 |
| chr21 | 20410000 | 20440000 | chr21 | 19975000 | 20010000 |
| chr21 | 20415000 | 20440000 | chr21 | 20035000 | 20055000 |
| chr21 | 21885000 | 21945000 | chr21 | 20985000 | 21040000 |
| chr21 | 22770000 | 22835000 | chr21 | 20980000 | 21035000 |
| chr21 | 23960000 | 23975000 | chr21 | 23845000 | 23860000 |
| chr21 | 25715000 | 25740000 | chr21 | 25600000 | 25615000 |
| chr21 | 25785000 | 25805000 | chr21 | 25720000 | 25740000 |
| chr21 | 25800000 | 25805000 | chr21 | 25605000 | 25610000 |
| chr21 | 25855000 | 25880000 | chr21 | 25605000 | 25615000 |
| chr21 | 27685000 | 27735000 | chr21 | 26830000 | 26880000 |
| chr21 | 28715000 | 28765000 | chr21 | 26825000 | 26870000 |
| chr21 | 28735000 | 28755000 | chr21 | 28015000 | 28035000 |
| chr21 | 29325000 | 29330000 | chr21 | 29235000 | 29240000 |
| chr21 | 29340000 | 29385000 | chr21 | 29070000 | 29110000 |
| chr21 | 29340000 | 29385000 | chr21 | 29155000 | 29180000 |
| chr21 | 29625000 | 29660000 | chr21 | 29470000 | 29510000 |
| chr21 | 29630000 | 29670000 | chr21 | 29060000 | 29100000 |
| chr21 | 29825000 | 29860000 | chr21 | 29460000 | 29500000 |
| chr21 | 29835000 | 29860000 | chr21 | 29635000 | 29655000 |
| chr21 | 29835000 | 29865000 | chr21 | 29070000 | 29115000 |
| chr21 | 29845000 | 29875000 | chr21 | 29360000 | 29390000 |
| chr21 | 31565000 | 31615000 | chr21 | 31180000 | 31220000 |
| chr21 | 31575000 | 31605000 | chr21 | 31090000 | 31120000 |
| chr21 | 31845000 | 31895000 | chr21 | 31610000 | 31655000 |
| chr21 | 32230000 | 32270000 | chr21 | 31975000 | 32005000 |
| chr21 | 32230000 | 32290000 | chr21 | 31850000 | 31885000 |
| chr21 | 32245000 | 32280000 | chr21 | 31770000 | 31805000 |
| chr21 | 32565000 | 32610000 | chr21 | 32390000 | 32415000 |
| chr21 | 32725000 | 32730000 | chr21 | 32610000 | 32615000 |
| chr21 | 33170000 | 33200000 | chr21 | 32915000 | 32950000 |
| chr21 | 33170000 | 33205000 | chr21 | 32835000 | 32850000 |
| chr21 | 33590000 | 33615000 | chr21 | 33190000 | 33215000 |
| chr21 | 33860000 | 33910000 | chr21 | 33185000 | 33220000 |
| chr21 | 34175000 | 34205000 | chr21 | 34045000 | 34075000 |
| chr21 | 34185000 | 34205000 | chr21 | 33915000 | 33925000 |
| chr21 | 34220000 | 34250000 | chr21 | 33910000 | 33930000 |
| chr21 | 34330000 | 34375000 | chr21 | 33905000 | 33935000 |
| chr21 | 34600000 | 34640000 | chr21 | 33890000 | 33925000 |
| chr21 | 34630000 | 34635000 | chr21 | 34510000 | 34515000 |
| chr21 | 35010000 | 35040000 | chr21 | 34880000 | 34910000 |
| chr21 | 35090000 | 35125000 | chr21 | 34875000 | 34910000 |
| chr21 | 35370000 | 35405000 | chr21 | 35085000 | 35115000 |
| chr21 | 35375000 | 35415000 | chr21 | 35010000 | 35045000 |
| chr21 | 35385000 | 35415000 | chr21 | 34870000 | 34900000 |
| chr21 | 35390000 | 35415000 | chr21 | 34735000 | 34760000 |
| chr21 | 35810000 | 35850000 | chr21 | 34690000 | 34760000 |
| chr21 | 35815000 | 35845000 | chr21 | 35680000 | 35710000 |
| chr21 | 35830000 | 35845000 | chr21 | 35400000 | 35420000 |
| chr21 | 35915000 | 35950000 | chr21 | 34685000 | 34760000 |
| chr21 | 36010000 | 36045000 | chr21 | 34690000 | 34760000 |
| chr21 | 36310000 | 36350000 | chr21 | 36135000 | 36165000 |
| chr21 | 36570000 | 36610000 | chr21 | 36120000 | 36155000 |
| chr21 | 36890000 | 36940000 | chr21 | 36410000 | 36450000 |
| chr21 | 37435000 | 37465000 | chr21 | 37250000 | 37275000 |
| chr21 | 37570000 | 37600000 | chr21 | 37160000 | 37190000 |
| chr21 | 37630000 | 37660000 | chr21 | 37160000 | 37185000 |
| chr21 | 38115000 | 38195000 | chr21 | 37665000 | 37745000 |
| chr21 | 38325000 | 38365000 | chr21 | 38145000 | 38175000 |
| chr21 | 38325000 | 38365000 | chr21 | 38200000 | 38230000 |
| chr21 | 38330000 | 38380000 | chr21 | 37675000 | 37735000 |
| chr21 | 39080000 | 39145000 | chr21 | 38725000 | 38760000 |
| chr21 | 39370000 | 39470000 | chr21 | 38775000 | 38845000 |
| chr21 | 39690000 | 39725000 | chr21 | 39510000 | 39535000 |
| chr21 | 40100000 | 40130000 | chr21 | 39510000 | 39545000 |
| chr21 | 40115000 | 40140000 | chr21 | 39850000 | 39870000 |
| chr21 | 41040000 | 41090000 | chr21 | 40125000 | 40170000 |
| chr21 | 41765000 | 41800000 | chr21 | 41600000 | 41635000 |
| chr21 | 42085000 | 42125000 | chr21 | 41600000 | 41640000 |
| chr21 | 42095000 | 42130000 | chr21 | 41790000 | 41840000 |
| chr21 | 42430000 | 42465000 | chr21 | 42305000 | 42330000 |
| chr21 | 42430000 | 42475000 | chr21 | 42135000 | 42180000 |
| chr21 | 43600000 | 43665000 | chr21 | 43185000 | 43210000 |
| chr21 | 43640000 | 43670000 | chr21 | 42890000 | 42930000 |
| chr21 | 44255000 | 44300000 | chr21 | 43800000 | 43835000 |
| chr21 | 44770000 | 44810000 | chr21 | 44495000 | 44525000 |
| chr21 | 44915000 | 44945000 | chr21 | 44500000 | 44525000 |
| chr21 | 44930000 | 44945000 | chr21 | 44790000 | 44805000 |
| chr21 | 45120000 | 45155000 | chr21 | 44940000 | 44970000 |
| chr21 | 45275000 | 45295000 | chr21 | 45135000 | 45155000 |
| chr21 | 45640000 | 45645000 | chr21 | 45560000 | 45565000 |
| chr21 | 45790000 | 45840000 | chr21 | 45540000 | 45570000 |
| chr21 | 45795000 | 45835000 | chr21 | 45125000 | 45155000 |
| chr21 | 45800000 | 45840000 | chr21 | 45450000 | 45475000 |
| chr21 | 46090000 | 46095000 | chr21 | 45970000 | 45975000 |
| chr21 | 46445000 | 46460000 | chr21 | 46330000 | 46345000 |
| chr21 | 46620000 | 46645000 | chr21 | 46450000 | 46475000 |

**Supplemental Figures**

**Supplemental Figure 1**

**Supplemental Figure 1. Comparison between CPU version HICCUPS and GPU version HICCUPS, RAM usage comparison between cDBSCAN and kDBSCAN and workflow of cLoops**

(A) Comparison of CPU-HiCCUPS called and GPU-HiCCUPS called loops’ distance between anchors using GM12878 HiC data. (B) Comparison of maximal RAM usage based on 10 repeats for the simulation data. Error bars denote standard deviation. (C) Comparison of maximal RAM usage using real GM12878 CTCF ChIA-PET data (GSM1872886) for each chromosome based on 5 repeats, with eps=750 and minPts=5. Error bars denote standard deviation. (D) For the input BEDPE file**,** each intra-chromosomal PET is mapped to a 2D space. Then all points (PETs) in the 2D space are clustered by cDBSCAN. Clusters obtained from cDBSCAN are further classified into self-ligation clusters and inter-ligation clusters. The PETs in these two kinds of clusters are used to model the distance cutoff for potential self-ligated PETs and remove them from the inter-ligation clusters. The inter-ligation clusters are treated as candidate loops and further estimated by the permutated local background model for statistical significances.

**Supplemental Figure 2**

**Supplemental Figure 2. Mean loops comparison for ChIA-PET data with different distance filtering**

Shown are centerNormedAPA heatmaps from Juicer aggregate peak analysis (APA) were showed. The P2M score is the mean of all P2M values, which indicate the enrichment of loops compared to nearby regions. In the Juicer APA analysis, -n was set to 0 to keep all loops for analysis (a), 10 to show loops with anchor distances >= 50kb (b), 20 to identify loops with anchor distance >= 100kb (c).

**Supplemental Figure 3**

**Supplemental Figure 3. cLoops applied to ChIA-PET data and more comparison**

(A) Shown are centerNormedAPA heatmaps from Juicer aggregate peak analysis (APA) were showed. In the Juicer APA analysis, -n was set to 30 to keep show loops with anchor distances >= 150kb. (B) Cumulative APA for evaluating the qualities of loops called from ChIA-PET data using Hi-C data. Higher scores mean the loops are better supported by Hi-C (APA score > 1.0). (C) Pearson correlation coefficient (PCC) between loop p-values (-log10 transformed) and anchor distances.

**Supplemental Figure 4**

**Supplemental Figure 4. cLoops applied to Hi-C data and more comparison with other tools**

(a) GM12878 Hi-C loops overlap with CTCF ChIA-PET loops called by cLoops and Mango. (b) GM12878 Hi-C loops overlap with RAD21 ChIA-PET loops called by cLoops and Mango. (c) GM12878 Hi-C loops overlap with cohesin HiChIP loops called by cLoops and HiCCUPS. (d) PCC between loop anchor distances and PETs numbers. Due to experimental bias, more PETs are observed for closer linearly genome locus, so negative PCC means the algorithm does not remove the distance bias when calling loops. (e) Distribution of distances between loop anchors. (f) Mean ChIP-seq signal of CTCF, RAD21 and SMC3 on loop anchors. (G) Precision recall curve in chr21 on the GM12878 Hi-C dataset. Manually marked loops in chr21 are used as true positives. (H) Precision recall curve in chr21 on the K562 Hi-C dataset. Manually marked loops in chr21 (Supplemental Table 7 and Supplemental Table 8) are used as true positives.

**Supplemental Figure 5**

**Supplemental Figure 5. Whole genome mean loops of HiC and low-depth sequencing HiChIP data in 10kb resolution**

(A) APA for called loops for GM12878 and K562 HiC data in 10kb resolution. (B) APA for called loops for cohesion HiChIP data in 10kb resolution, tech1 stands for technical replicate 1 and tech2 stands for technical replicate 2.

**Supplemental Figure 6**

**Supplemental Figure 6. More examples of called loops in Hi-C data**

Color range from white to red denotes number of PETs in each pixel.

**Supplemental Figure 7**

**Supplemental Figure 7. Additional overlap comparison of deep sequenced HiChIP loops, cLoops applied to under sequenced HiChIP data and more comparison with other tools**

(A) Deep sequenced HiChIP data called loops overlapping with Mango called CTCF ChIA-PET loops, RAD21 ChIA-PET loops and HiCCUPS called Hi-C loops. (B) Deep sequenced HiChIP data uniquely detected loops overlapping with Mango called CTCF ChIA-PET loops, RAD21 ChIA-PET loops and HiCCUPS called Hi-C loops. (C) Overlap with CTCF ChIA-PET loops (called by cLoops) for loops called from under-sequenced HiChIP data. (D) Overlap with RAD21 ChIA-PET loops (called by cLoops) for loops called from under-sequenced HiChIP data. (E) Overlap with Hi-C loops (called by cLoops) for loops called from under-sequenced HiChIP data. (F) PCC between loop anchor distances and PET numbers. (G) Distribution of distances between loop anchors. (H) Overlapped loops between two technology replicates. (I) Mean ChIP-seq signal of CTCF, RAD21 and SMC3 on loop anchors.

**Supplemental Figure 8**

**Supplemental Figure 8. ZscoreLL and P2LL scores for evaluation of loops qualities**

The ZscoreLL and P2LL scores computed by Juicer for evaluating global loop qualities for ChIA-PET data (A), Hi-C data (B), HiChIP data (C) and Trac-looping data (D). There are no scores reported for GOTHiC and diffHic in the Hi-C data as they called too many loops that crash the Juicer APA processing

**Supplemental Figure 9**

**Supplemental Figure 9. Distributions of loop anchor sizes.**

Loop anchor sizes distribution for ChIA-PET data (A), Hi-C data (B), HiChIP data (C) and Trac-looping data (D). The anchor sizes for GOTHiC, Fit-Hi-C and HOMER were set to 20kb as they only output a coordinate for an anchor and the input resolution was set to 10kb.

**Supplemental Figure 10**

**Supplemental Figure 10. cLoops applied to Hi-C data and comparison with other tools.**

(A) Example of loops called by each tool for the same region (left) and 5 kb resolution APA for called loops (right) for GM12878 Hi-C data. centerNormedAPA heatmaps from Juicer APA analysis were shown for the mean loops. The number of loops and P2M score from whole genome-wide analysis were annotated at head of each dataset heatmap. (B) Comparison for K562 Hi-C data. Color range from white to red in A (left) and B (left) denotes number of PETs in each pixel.

**Supplemental Figure 11**

**Supplemental Figure 11. cLoops applied to deep sequenced HiChIP data and comparison with HiCCUPS.**

(A) Examples of loops called by cLoops (upper) and HiCCUPS (lower) for merged GM12878 cohesin HiChIP data. The loops called by HiCCUPS were obtained from the HiChIP original paper. Color range from white to red denotes number of PETs in each pixel. (B) Mean profile heatmap of loops called by cLoops. (C) Mean profile heatmap of loops called by HiCCUPS. (D) Mean ChIP-seq signal of CTCF, RAD21 and SMC3 on loop anchors. (E) Loops overlapping with cLoops called CTCF ChIA-PET loops, RAD21 ChIA-PET loops and Hi-C loops. (F) Distribution of distances between loop anchors for all loops. (G) Mean profile heatmap of unique loops detected by cLoops (upper) and HiCCUPS (lower). (H) Uniquely detected loops overlapping with cLoops called CTCF ChIA-PET loops, RAD21 ChIA-PET loops and Hi-C loops. (I) Distribution of distances between loop anchors of uniquely detected loops.

**Supplemental Figure 12**

**Supplemental Figure 12. cLoops applied to under-sequenced HiChIP data and comparison with other tools.**

(A) Examples of loops called for the same region of under-sequenced two technical

replicates for cohesin GM12878 HiChIP data. Color range from white to red denotes number of PETs in each pixel. (B) Mean profile heatmaps. tech1 stands for technical replicate 1 and tech2 stands for technical replicate 2.

**References**

Ay F, Bailey TL, Noble WS. 2014. Statistical confidence estimation for Hi-C data reveals regulatory chromatin contacts. *Genome Res* **24**: 999-1011.

Boyle AP, Araya CL, Brdlik C, Cayting P, Cheng C, Cheng Y, Gardner K, Hillier LW, Janette J, Jiang L et al. 2014. Comparative analysis of regulatory information and circuits across distant species. *Nature* **512**: 453-456.

Durand NC, Shamim MS, Machol I, Rao SS, Huntley MH, Lander ES, Aiden EL. 2016. Juicer Provides a One-Click System for Analyzing Loop-Resolution Hi-C Experiments. *Cell systems* **3**: 95-98.

Heidari N, Phanstiel DH, He C, Grubert F, Jahanbani F, Kasowski M, Zhang MQ, Snyder MP. 2014. Genome-wide map of regulatory interactions in the human genome. *Genome Res* **24**: 1905-1917.

Heinz S, Benner C, Spann N, Bertolino E, Lin YC, Laslo P, Cheng JX, Murre C, Singh H, Glass CK. 2010. Simple combinations of lineage-determining transcription factors prime cis-regulatory elements required for macrophage and B cell identities. *Molecular cell* **38**: 576-589.

Lai B, Tang Q, Jin W, Hu G, Wangsa D, Cui K, Stanton BZ, Ren G, Ding Y, Zhao M et al. 2018. Trac-looping measures genome structure and chromatin accessibility. *Nat Methods* **15**: 741-747.

Lareau CA, Aryee MJ. 2018. hichipper: a preprocessing pipeline for calling DNA loops from HiChIP data. *Nat Methods* **15**: 155-156.

Li G, Chen Y, Snyder MP, Zhang MQ. 2017. ChIA-PET2: a versatile and flexible pipeline for ChIA-PET data analysis. *Nucleic acids research* **45**: e4.

Lun AT, Smyth GK. 2015. diffHic: a Bioconductor package to detect differential genomic interactions in Hi-C data. *BMC Bioinformatics* **16**: 258.

Mifsud B, Martincorena I, Darbo E, Sugar R, Schoenfelder S, Fraser P, Luscombe NM. 2017. GOTHiC, a probabilistic model to resolve complex biases and to identify real interactions in Hi-C data. *PLoS One* **12**: e0174744.

Mumbach MR, Rubin AJ, Flynn RA, Dai C, Khavari PA, Greenleaf WJ, Chang HY. 2016. HiChIP: efficient and sensitive analysis of protein-directed genome architecture. *Nat Methods* **13**: 919-922.

Paulsen J, Rodland EA, Holden L, Holden M, Hovig E. 2014. A statistical model of ChIA-PET data for accurate detection of chromatin 3D interactions. *Nucleic acids research* **42**: e143.

Phanstiel DH, Boyle AP, Heidari N, Snyder MP. 2015. Mango: a bias-correcting ChIA-PET analysis pipeline. *Bioinformatics* **31**: 3092-3098.

Rao SS, Huntley MH, Durand NC, Stamenova EK, Bochkov ID, Robinson JT, Sanborn AL, Machol I, Omer AD, Lander ES et al. 2014. A 3D map of the human genome at kilobase resolution reveals principles of chromatin looping. *Cell* **159**: 1665-1680.

Tang Z, Luo OJ, Li X, Zheng M, Zhu JJ, Szalaj P, Trzaskoma P, Magalska A, Wlodarczyk J, Ruszczycki B et al. 2015. CTCF-Mediated Human 3D Genome Architecture Reveals Chromatin Topology for Transcription. *Cell* **163**: 1611-1627.
